## Correction

# Correction: The Self-Limiting Dynamics of TGF- $\beta$ Signaling *In Silico* and *In Vitro*, with Negative Feedback through PPM1A Upregulation

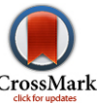

## The PLOS Computational Biology Staff

There are affiliations missing for the corresponding author. The full affiliation for Hanry Yu should read:

Institute of Bioengineering and Nanotechnology, Agency for Science, Technology and Research, Singapore, Computational and Systems Biology, Singapore-MIT Alliance, Singapore, BioSyM, Singapore-MIT Alliance for Research and Technology, Singapore, Mechanobiology Institute, Singapore, NUS Graduate School for Integrative Science and Engineering, National University of Singapore, Singapore, Department of Physiology, National University of Singapore, Singapore, Department of Biological Engineering, Massachusetts Institute of Technology, Cambridge, Massachusetts, United States of America.

## Reference

1. Wang J, Tucker-Kellogg L, Ng IC, Jia R, Thiagarajan PS, et al. (2014) The Self-Limiting Dynamics of TGF- $\beta$  Signaling *In Silico* and *In Vitro*, with Negative Feedback through PPM1A Upregulation. *PLoS Comput Biol* 10(6): e1003573. doi:10.1371/journal.pcbi.1003573

**Citation:** The PLOS Computational Biology Staff (2014) Correction: The Self-Limiting Dynamics of TGF- $\beta$  Signaling *In Silico* and *In Vitro*, with Negative Feedback through PPM1A Upregulation. *PLoS Comput Biol* 10(8): e1003832. doi:10.1371/journal.pcbi.1003832

**Published:** August 8, 2014

**Copyright:** © 2014 The PLOS Computational Biology Staff. This is an open-access article distributed under the terms of the Creative Commons Attribution License, which permits unrestricted use, distribution, and reproduction in any medium, provided the original author and source are credited.
